# Supplementary material for: Rapid labelling and covalent inhibition of intracellular native proteins using ligand-directed N-acyl-N-alkyl sulfonamide
Source: PubMed Central journal article supplement (PMC5951806; doi:10.1038/s41467-018-04343-0), 2018-05-14
Supplement: 41467_2018_4343_MOESM3_ESM.pdf [file 41467_2018_4343_MOESM3_ESM.pdf]

## **Description of Additional Supplementary Files**

File Name: Supplementary Data 1

Description: List of proteins identified in the LC-MSMS analysis of proteins labelled with 11.
